# Supplementary material
Source: Research Square preprint supplement (doi:10.21203/rs.3.rs-9668424/v1)
Supplement: Supplementary file 1 [file a9a1be5af420d5f5f1c2ae91.docx]

**Supplementary Materials**

Figure two: a diagram representing the themes and subthemes related to navigating the experience [Insert figure 2 here]

Figure three: Themes and subthemes related to what helped/did not help to cope with the challenges [Insert figure 3 here]

Figure four: Themes and subthemes related to reflections on ideal support, integration, timing and positive effects [Insert figure 4 here]

Table two: Table of themes

| Themes and subthemes | Frequency | % of participants | Illustrative quote |
| --- | --- | --- | --- |
| **Superordinate theme 1 - Navigating the experience** |  |  |  |
| **Extended challenges** | **10** | **100%** |  |
| Existential and ontological confusion | 8 | 80% | *“Every second of my day for a long time … a year or year and a half … I just kept thinking about the fact that we are on this earth, on this rock, we are inevitably going to die and nothing matters. And it was this nihilistic view of the world, of us, it took me a year and a half to really get to be okay with that” (Dana)* |
| Ruminative introspection | 7 | 70% | *“I was stuck in a mindset like, "I'm the only person that this has ever happened to. There's nothing that I can do" (Rob)* |
| Social disconnection | 5 | 50% | *“Someone would ask me something, or like, we'd be having a normal conversation, and I'd be thinking about, "Was that a normal response to have?" And then I try and think about, based off what I know about myself already and how I am and my self identity, the response that I would expect myself to give. It was like I was pretending to be myself in a weird way, if that makes sense. It's like I'd be formulating a response that I thought I'd have” (Jude)* |
| Emotional difficulties | 4 | 40% | *“It’s messed me up mentally, and emotionally, you know?” (Adam)* |
| Psychosis-like symptoms | 4 | 40% | *“I was just really detached, psychosis-esque, just not really attached to reality” (Aaron)* |
| Somatic difficulties | 4 | 40% | *“The store of tension from these experiences, which were incredibly stressful on the body. Incredibly stressful” (Ulli)* |
| PTSD symptoms | 3 | 30% | *“PTSD is probably the biggest impact I’ve had from that” (Rob)* |
| **Support-seeking processes** | **10** | **100%** |  |
| Family and friends unapproachable | 7 | 70% | *“So I call my dad and basically told him and he's like, “Ah, shit. So you just became a stoner?” And he dragged me to a psych ward” (Adam)* |
| Difficulty articulating their experiences | 6 | 60% | *“Part of the nature of the experience was that it wasn’t meant to be communicated” (Ulli)* |
| Education through online resources and communities | 5 | 50% | *“The best thing I ever got for information was Reddit, Google, Twitter. Those people have no reason to fake it, make it up, generate a false report, try and paint it in a certain light. If you read 10,000 people's reports, you kind of get an average of what it does to a human being, without any of the ego, or personality-related differences” (Jess)* |
| Sought wisdom through others experienced with psychedelics | 4 | 40% | *“Because I was so confused about what had happened, I started doing research and I found a group … I think they called themselves the Psychonauts. And they were literally people who came together and they would have lectures and stuff, or informal conversations. So I remember going to a couple of those lectures to just get a broader understanding of what the hell it was that had happened. And yeah, I think that helped me to logically understand what had happened” (Elena)* |
| **Superordinate theme 2 - What helped and what did not help to cope with the challenges** |  |  |  |
| **What helped** | **9** | **90%** |  |
| The presence of caring friends, family and community | 6 | 60% | *“I think talking about how you feel. Just being open with another person really, really helps” (Mila)* |
| Cognitive, intellectual and philosophical reframing | 6 | 60% | “One of the tools that I was using... I would tell myself, "I've experienced this before. You're still here". And that was something that was undeniable. No matter what was going on, no matter how I was experiencing it at the time, that was undeniable. And an undeniable fact. In that moment, and those moments, anything undeniable was gold, because it would give you something to like anchor your consciousness onto” (Ulli) |
| Substances | 5 | 50% | *“Yeah. So that [marijuana] was actually a massive, massively huge part of getting over my trauma and my negative reactions to my HPPD hallucinations” (Rob)* |
| Creative expression | 3 | 30% | *“So music, I think, was a way for me to explore and to express some of the experiences that I had, some of the questioning. And it was also a way for me to establish an identity for myself, because there wasn't really a whole lot of social structure for what I was going through” (Aaron)* |
| Somatic practices | 3 | 30% | *“Breathing techniques would… activate my parasympathetic nervous system and also give my mind something to be distracted with and that would bring me back down” (Ulli)* |
| **What did not help** | **9** | **90%** |  |
| Lack of access to balanced educational resources | 7 | 70% | *“I feel like there's not enough education about it, if you don't shake it out yourself. Like, when you go to school, it's more just like "Drugs are bad". You don't really cover psychedelics and stuff, really. They don't really cover the whole, "this can mess with your head", unless you seek it out. It's just like, "Drugs are bad. Stay away from it" (Jude)* |
| Stifling clinical relationships and environments | 4 | 40% | *“Having a psychologist was really good and it helped me but at the same time, it's still lonely because you're there with your therapist. And then when your session is over, your life continues and it's not a person that's really a part of your personal network, in that sense, because, you know, I don't know this guy. No, I just go to him and I pay him to help me deal with my emotions and my inner life. But it's not like it's an equal relationship” (Elena)* |
| **Superordinate theme 3 – Reflections on ideal support, integration, timing and positive effects** |  |  |  |
| **Ideal support** | **9** | **90%** |  |
| Access to balanced resources | 7 | 70% | *“I do want to live in a world where the dangers are examined in a very thoughtful and thorough way, because I've lived first-hand what happens when you're exposed to those dangers” (Eric)* |
| The presence of caring faces and spaces | 5 | 50% | *“If there's someone there - and I don't think it actually takes a lot - you can be a guide by just holding space and being non-judgmental. And it's not like you have to know all these other things. Of course, yeah, the knowledge is important, but it's not like you have to be a certified guide” (Elena)* |
| **What it means to have an experience at that age** | **10** | **100%** |  |
| Vulnerable to harm through youthful naivety | 8 | 80% | *“I felt invincible because I was, like, 15. So I was like, "Yeah, well, what'll happen to me?"” (Jude)* |
| Timing of experience was beneficial | 5 | 50% | *“So, for me, it was like an initiation into adulthood and into adult maturity, whether spiritual or physical. Just maturity, basically. Rite of passage into adulthood, I really felt that” (Mila)* |
| Young age irrelevant | 2 | 20% | *“Age is not as important as your desire to understand things, I think” (Dana)* |
| **Views on integration** | **10** | **100%** |  |
| Temporal - fluid linearity | 7 | 70% | *“And me saying this now, I’m still trying to understand what I’ve actually been through” (Elena)* |
| Structural - conceptual formulation | 6 | 60% | *“This is integration: making sense. It’s like forming structure. Not everything being all over the place” (Mila)* |
| Relational - transforming negatives into positives | 5 | 50% | *“To convert the bad thing into a good thing from a different angle. Get rid of the massive amount of negativity that was dug up and then reinterpret it to be a pleasant thing again, because the data was the same but the way it was interpreted was different” (Jess)* |
| Practical - social recalibration | 7 | 70% | *“You could say that I’ve really had to learn how to become a functioning citizen again” (Rob)* |
| **Positive effects** | **9** | **90%** |  |
| Externally-relational improvements | 8 | 80% | *“And I think in that point of view, it made me more empathetic, not just sympathetic” (Dana)* |
| Internally-relational improvements | 5 | 50% | *“I think that experience also helped me realise that I was not in touch with my emotions at all. I was suppressing, I guess, mostly negative emotions” (Elena)* |
